# Supplementary material
Source: publisher figshare collection journal article supplement (https://brill.figshare.com/articles/dataset/_/28497263)
Supplement: Supplementary file 1 [file 1]

## Sheet: Data S1
Spider	Treatment	Searched	Time Searched	Changed box	Wall or No	Disturbed	Column1	Explanation of data:	_1
49	C	1	9	1	No wall	1		Column A	spider identity
82	C	1	10	1	No wall	1		Column B	Treatment. Control (C), both boxes no wall (NN), both boxes wall (WW), first box no wall second box wall (NW), first box wall second box no wall (WN), completely undisturbed spiders (U).
86	C	1	7	1	No wall	1		Column C	Searched, binary response. 1 = searched, 0 = immediately attended to cricket
89	C	1	59	1	No wall	1		Column D	Time spider spent searching in seconds
165	C	0	0	1	No wall	1		Column E	Changed box. 1 = removed and replaced in same box, 2 = replaced in different box with same layout, 3 = replaced in different box with different layout
232018	C	0	0	1	No wall	1		Column F	Presence of wall in box trial was conducted in.
212018	C	1	48	1	No wall	1		Column G	Disturbed (removed from box). 1 = spiders were disturbed, 0 = spiders were undisturbed before being offered a cricket.
282018	C	1	6	1	No wall	1
202018	C	0	0	1	No wall	1
172018	C	1	5	1	No wall	1
82018	C	0	0	1	No wall	1
124	C	0	0	1	Wall	1
160	C	1	101	1	Wall	1
161	C	1	21	1	Wall	1
168	C	1	17	1	Wall	1
262018	C	0	0	1	Wall	1
182018	C	0	0	1	Wall	1
382018	C	0	0	1	Wall	1
72018	C	1	161	1	Wall	1
12018	C	1	18	1	Wall	1
102018	C	0	0	1	Wall	1
62018	C	1	18	1	Wall	1
162018	C	0	0	1	Wall	1
312018	C	0	0	1	Wall	1
29	NN	0	0	2	No wall	1
52	NN	0	0	2	No wall	1
53	NN	0	0	2	No wall	1
61	NN	1	47	2	No wall	1
80	NN	1	22	2	No wall	1
137	NN	0	0	2	No wall	1
139	NN	0	0	2	No wall	1
154	NN	0	0	2	No wall	1
179	NN	0	0	2	No wall	1
188	NN	0	0	2	No wall	1
35	NW	0	0	3	No wall	1
40	NW	0	0	3	No wall	1
103	NW	0	0	3	No wall	1
113	NW	0	0	3	No wall	1
118	NW	1	146	3	No wall	1
120	NW	1	17	3	No wall	1
123	NW	0	0	3	No wall	1
147	NW	0	0	3	No wall	1
150	NW	1	52	3	No wall	1
153	NW	1	12	3	No wall	1
1	U	0		0		0
2	U	0		0		0
4	U	0		0		0
5	U	0		0		0
6	U	0		0		0
10	U	0		0		0
12	U	0		0		0
15	U	0		0		0
16	U	0		0		0
19	U	0		0		0
21	U	0		0		0
24	U	0		0		0
25	U	0		0		0
26	U	0		0		0
18	WN	1	8	3	Wall	1
23	WN	0	0	3	Wall	1
24	WN	1	97	3	Wall	1
31	WN	0	0	3	Wall	1
44	WN	0	0	3	Wall	1
99	WN	1	5	3	Wall	1
111	WN	0	0	3	Wall	1
112	WN	1	19	3	Wall	1
130	WN	0	0	3	Wall	1
134	WN	1	17	3	Wall	1
140	WN	1	25	3	Wall	1
191	WN	1	8	3	Wall	1
46	WW	0	0	2	Wall	1
62	WW	0	0	2	Wall	1
65	WW	1	27	2	Wall	1
68	WW	0	0	2	Wall	1
76	WW	1	33	2	Wall	1
141	WW	1	55	2	Wall	1
156	WW	1	13	2	Wall	1
173	WW	1	40	2	Wall	1
176	WW	1	26	2	Wall	1
187	WW	0	0	2	Wall	1

## Sheet: Data S2
Spider	Treatment	Direction changes	Distance moved	Column4	Column2	Column3	Column1	Column contents	_1
18	WN	4	29.577
24	WN	11	79.755	Spider	Spider identity
49	C	2	24.056	Treatment	No wall week one no wall week two (NN), no wall week one wall week two (WN), wall both weeks (WW), wall box week one no wall week two (WN), control
61	NN	4	27.864	Direction changes	Number of times spider chagned direction while searching
65	WW	3	28.855	Distance moved	Distance (cm) that spider moved while searching
76	WW	1	24.132
80	NN	2	20.36
82	C	2	17.936
86	C	2	22.21
89	C	1	17.27
99	WN	1	21.752
112	WN	3	23.576
118	NW	4	23.09
120	NW	2	34.639
134	WN	2	20.896
140	WN	3	20.065
141	WW	6	59.369
150	NW	5	47.787
153	NW	2	25.828
156	WW	1	19.086
160	C	3	32.598
161	C	2	22.901
168	C	1	10.021
173	WW	1	20.514
176	WW	2	26.651
191	WN	1	20.803
12018	C	2	24.679
62018	C	2	27.143
72018	C	11	52.677
172018	C	1	21.229
212018	C	4	23.684
282018	C	1	21.381

## Sheet: Data S3
Spider	Searched	Abdomen	Sternum	Column1	_1	_2	_3	_4	_5	Column contents	_6
18	1	0.449	0.317							Spider	Spider identity
23	0	0.407	0.287							Searched	1 = spider searched, 0 = spider attended to the cricket immediately
24	1	0.557	0.328							Abdomen	Width (cm) of spider abdomen at widest point
29	0	0.43	0.334							Sternum	Width (cm) of spider sternum between legs 2 and 3.
31	0	0.47	0.32
35	0	0.419	0.305
40	0	0.518	0.331
44	0	0.482	0.382
46	0	0.58	0.293
49	1	0.382	0.326
52	0	0.43	0.299
53	0	0.528	0.378
61	1	0.495	0.291
62	0	0.485	0.276
65	1	0.534	0.314
68	0	0.526	0.351
76	1	0.452	0.321
80	1	0.393	0.292
82	1	0.372	0.301
86	1	0.477	0.344
89	1	0.418	0.279
99	1	0.495	0.312
103	0	0.516	0.281
111	0	0.407	0.341
112	1	0.367	0.308
113	0	0.388	0.303
118	1	0.393	0.282
120	1	0.453	0.328
123	0	0.478	0.305
124	0	0.489	0.316
130	0	0.525	0.32
134	1	0.412	0.323
137	0	0.321	0.317
139	0	0.298	0.257
140	1	0.422	0.276
141	1	0.354	0.269
147	0	0.51	0.355
150	1	0.4	0.283
153	1	0.387	0.299
154	0	0.464	0.38
156	1	0.474	0.309
160	1	0.393	0.277
161	1	0.49	0.361
165	0	0.514	0.297
168	1	0.408	0.341
173	1	0.465	0.29
176	1	0.454	0.299
179	0	0.372	0.285
187	0	0.427	0.292
188	0	0.475	0.26
191	1	0.514	0.387

## Sheet: Data S4
Spider	Offered cricket	Crick steal	Time move	Time searched	Time cricket	Time total	Got cricket	Column1	_1	Column contents:	_2
2018-16	Yes	1	2	0	3	5	1			Spider	Spider identity
2018-2	No	0	0	0	5	5	1			Offered cricket	Yes = spider offered cricket before being puffed, No = spider not offered cricket
2018-17	Yes	1	8	0	5	13	1			Crick steal	1 = yes from offered cricket, 0 = not offered cricket
2018-20	No	0	2	0	14	16	1			Time moved	Seconds from ceasing puffing until spider began to move
2018-10	Yes	1	6	0	4	10	1			Time searched	Time (seconds) spiders spent searching after being puffed
2018-1	No	0	2	0	2	4	1			Time cricket	Time (seconds) from beginning to move until beginning to flick silk at cricket
2018-18	Yes	1	4	0	2	6	1			Time total	Total time (seconds) from ceasing puffing until silk flicking
2018-28	No	0	11	0	2	13	1			Got crickeet	1 = spider eventually attacked cricket, 0 = spider never attacked cricket
44	No	0	8	0	9	17	1
2018-31	Yes	1	12	0	83	95	1
1002	No	0	2	0	2	4	1
125-20	Yes	1	2	0	1	3	1
161-11	No	0	0	0	0	0	0
2018-27	Yes	1	2	0	2	4	1
16-24	No	0	90	0	17	107	1
2018-38	Yes	1	3	0	16	19	1
99-19	No	0	0	0	0	0	0
